# Supplementary material for: Semiconductor biohybrids for enhanced bifunctional wastewater sulfur and heavy metal removal
Source: Royal Society of Chemistry journal article supplement (doi:10.1039/d3gc04789j), 2024-01-01
Supplement: d3gc04789j1.pdf [file d3gc04789j1.pdf]

## **Semiconductor biohybrids for enhanced bifunctional wastewater sulfur and heavy metal removal**

Yanju Zhang <sup>a,b</sup>, Furui Fang <sup>a</sup>, Xiaoxiao Qian <sup>a</sup>, Liangchen Li <sup>a</sup>, Zongli Huo<sup>c</sup>, Jingjing Zhang <sup>c</sup>, Dandan Dong <sup>d</sup>, Chaofeng Huang<sup>\*d</sup>, JiaYuan Li<sup>e</sup>, Yonghong Hu <sup>a,b</sup> \*, Li Mi <sup>a,b</sup> \*

- a. College of Biotechnology and Pharmaceutical Engineering, Nanjing Tech University, No. 30, South Puzhu Road, Nanjing 211816, China.*
- b. State Key Laboratory of Materials-Oriented Chemical Engineering, Nanjing Tech University, No. 30, South Puzhu Road, Nanjing 211816, China.*
- c. Jiangsu Provincial Center for Disease Control and Prevention, No.172 Jiangsu Road, Nanjing, 210009, China*
- d. College of Chemical Engineering Shihezi University, Shihezi 832000, China*
- e. Nanjing Polytechnic Institute, No.188, Xinle Road, Jiangbei New Area, Nanjing, 210009, China*

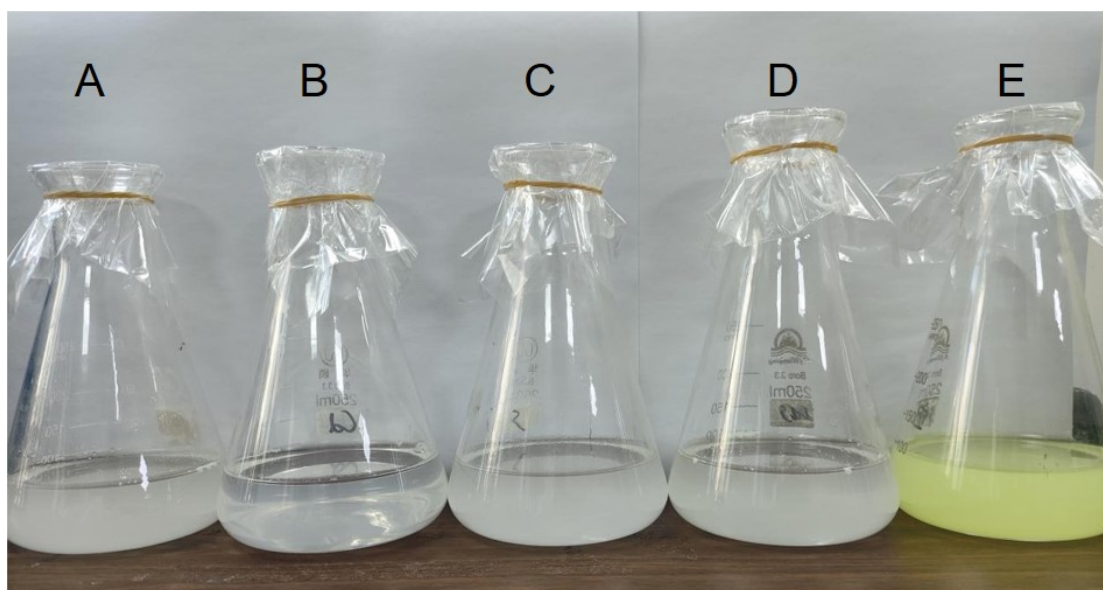

**Figure S1** Photograph of the (A) *H. neapolitanus*, (B) *H. neapolitanus* with only  $\text{Cd}^{2+}$ , (C) *H. neapolitanus* with only cysteine, (D) only  $\text{Cd}^{2+}$  and cysteine, and (E)  $\text{CdS-H. neapolitanus}$  biohybrid with  $\text{Cd}^{2+}$  and cysteine.

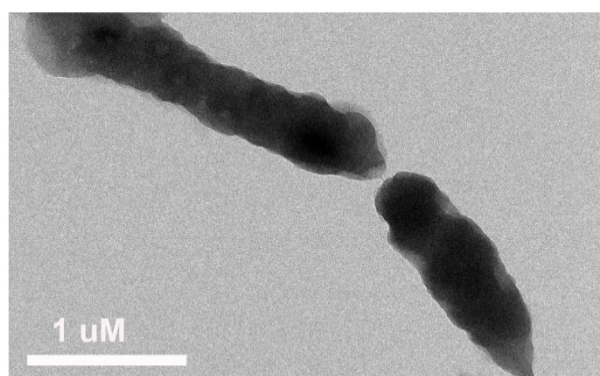

**Figure S2** The SEM images of *H. neapolitanus*.

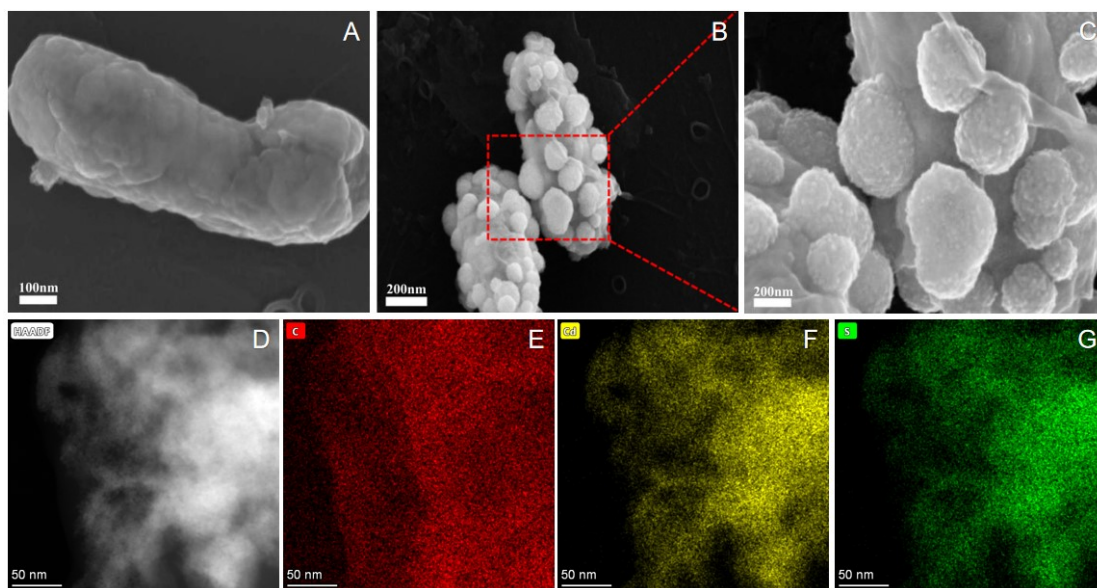

**Figure S3** The SEM images of *H. neapolitanus* and CdS-*H. neapolitanus* biohybrid system; (A) *H. neapolitanus* (B) the overall view of the CdS-*H. neapolitanus* biohybrid system (C) the partial view of the CdS-*H. neapolitanus* biohybrid system.(D-G) SEM images of CdS-*H. neapolitanus* biohybrid system(D) and EDS mappings shows the distribution of (E) carbon (C), (F) cadmium (Cd) and (G) sulfur (S) in CdS-*H. neapolitanus* biohybrid system.

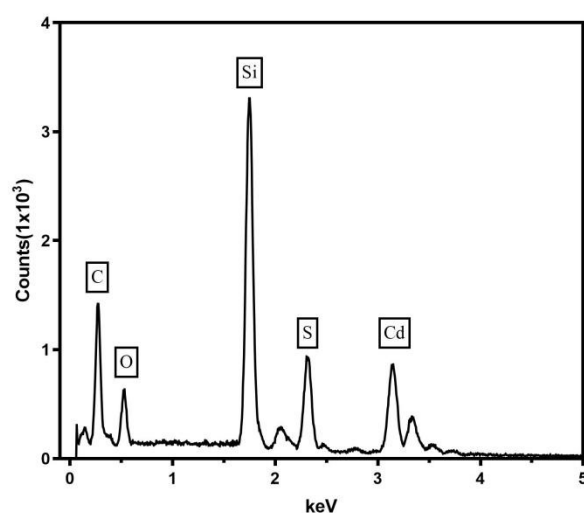

**Figure S4** EDS spectrum analysis of CdS-*H. neapolitanus* biohybrid.

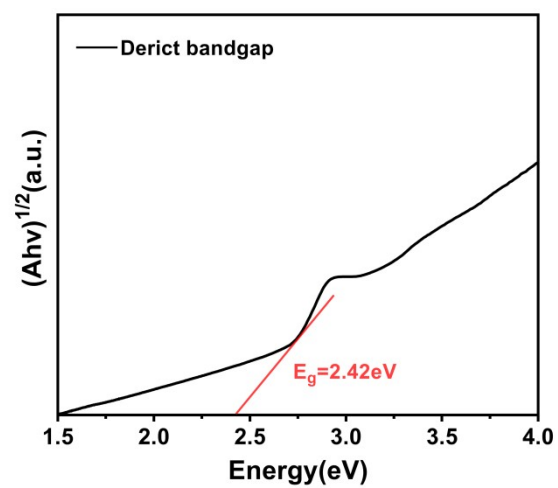

**Figure S5** Calculation of direct bandgap of CdS NPs.

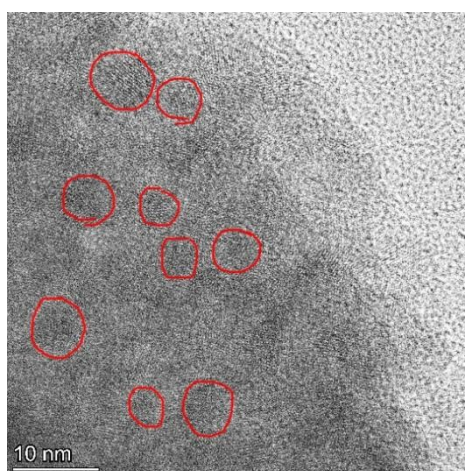

**Figure S6** HRTEM images of CdS NPs.

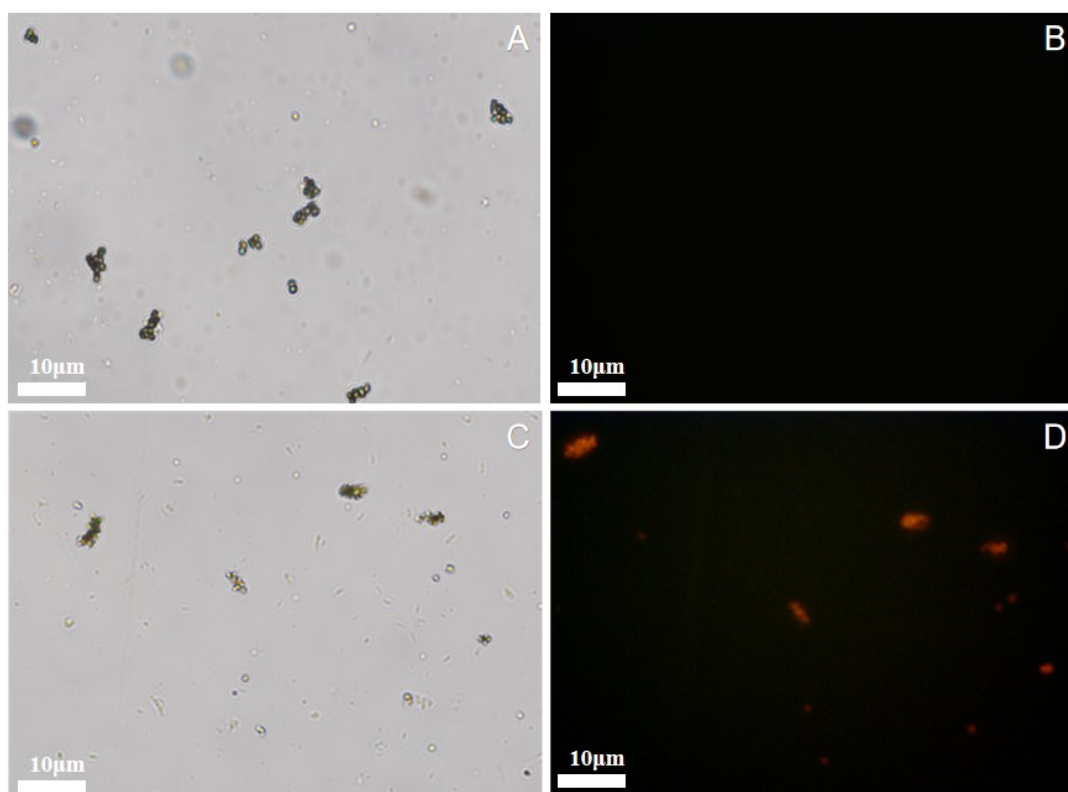

**Figure S7** Optical fluorescence microscopy images of the *H. neapolitanus* (A-B) and the CdS-*H. neapolitanus* biohybrid system (C-D), where the scale bar represents 10 μm. Images (A) and (C) are in brightfields, while images (B) and (D) depicts the bright red channel, showing the fluorescence by the CdS-*H. neapolitanus* biohybrid system.

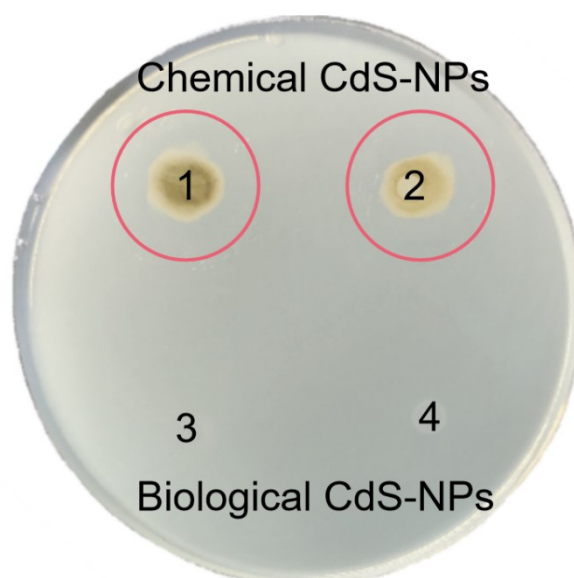

**Figure S8** The ecotoxicity for Chemical and Biological Cds NPs.

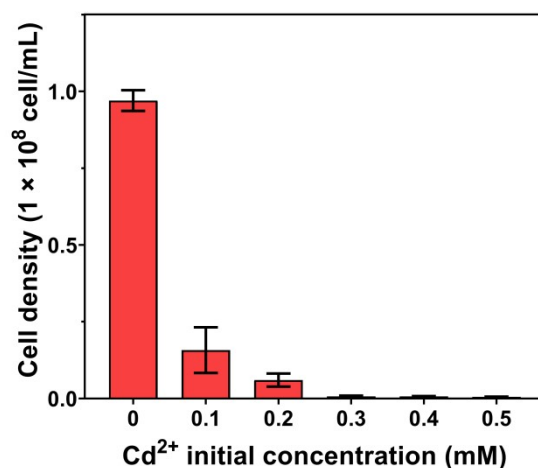

**Figure S9** The cell density of *H. neapolitanus* with different initial  $\text{Cd}^{2+}$  concentrations after 120 h cultivation (without protection from the cysteine).

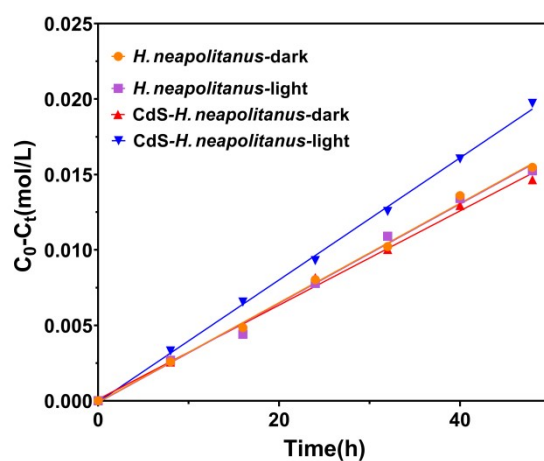

**Figure S10** The sulphur removal efficiency of *H. neapolitanus* (light/dark) and CdS-*H. neapolitanus* biohybrid (light/dark).

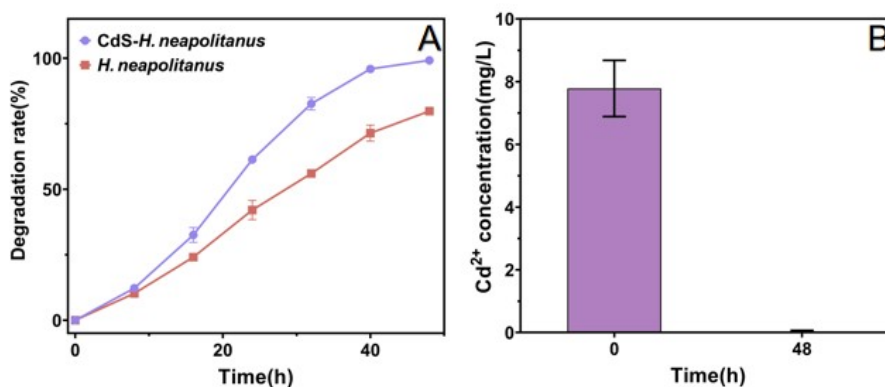

**Figure S11** (A)The desulfurization efficiency in industrial wastewater of the *H. neapolitanus* (light/dark) and CdS-*H. neapolitanus* biohybrid (light/dark) (B)The  $\text{Cd}^{2+}$  density in industrial wastewater of the CdS-*H. neapolitanus* biohybrid (light/dark)

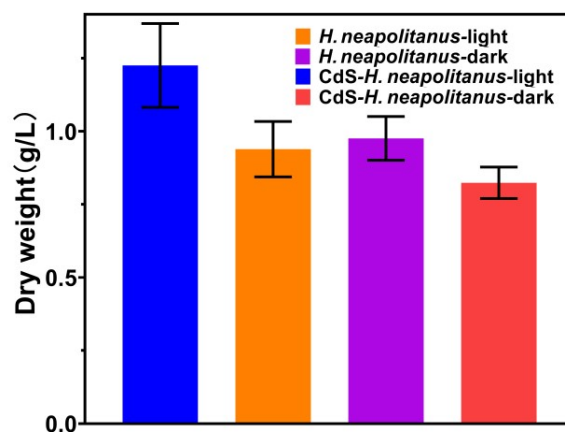

**Figure S12** Dry weight of *H. neapolitanus* (light/dark) and CdS-*H. neapolitanus* biohybrid (light/dark) in the solar-driven desulfurization process.

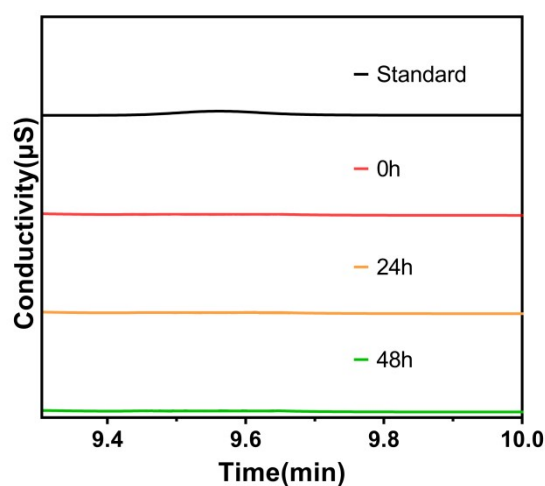

**Figure S13** Ion chromatogram of CdS NPs to oxidize  $\text{Na}_2\text{S}_2\text{O}_3$  to form  $\text{SO}_4^{2-}$  at different time.

**Table S1** Mediums for cell culture

|                                                             |        |
|-------------------------------------------------------------|--------|
| Medium I                                                    | 1000mL |
| DDW                                                         | 1000mL |
| $\text{Na}_2\text{S}_2\text{O}_3 \cdot 5\text{H}_2\text{O}$ | 5g     |
| $\text{KNO}_3$                                              | 2g     |
| $\text{KH}_2\text{PO}_4$                                    | 2g     |
| $\text{NaHCO}_3$                                            | 1g     |
| $\text{NHCl}_4$                                             | 0.5g   |

|                                      |        |
|--------------------------------------|--------|
| MgCl <sub>2</sub>                    | 0.5g   |
| FeSO <sub>4</sub> ·7H <sub>2</sub> O | 0.02g  |
| <hr/>                                |        |
| Medium II                            | 1000mL |
| <hr/>                                |        |
| DDW                                  | 1000mL |
| KNO <sub>3</sub>                     | 2g     |
| KH <sub>2</sub> PO <sub>4</sub>      | 2g     |
| NaHCO <sub>3</sub>                   | 1g     |
| NHCl <sub>4</sub>                    | 0.5g   |
| MgCl <sub>2</sub>                    | 0.5g   |
| FeSO <sub>4</sub> ·7H <sub>2</sub> O | 0.02g  |
| <hr/>                                |        |
